# Supplementary material for: Nanoscale synchrotron X-ray speciation of iron and calcium compounds in amyloid plaque cores from Alzheimer's disease subjects
Source: PubMed Central journal article supplement (PMC6034173; doi:10.1039/c7nr06794a), 2018-04-24

## Supplementary figures

**Figure S1.** Scaled iron  $L_{2,3}$ -edge absorption reference spectra used to fit the amyloid plaque core iron spectra described in the main text.

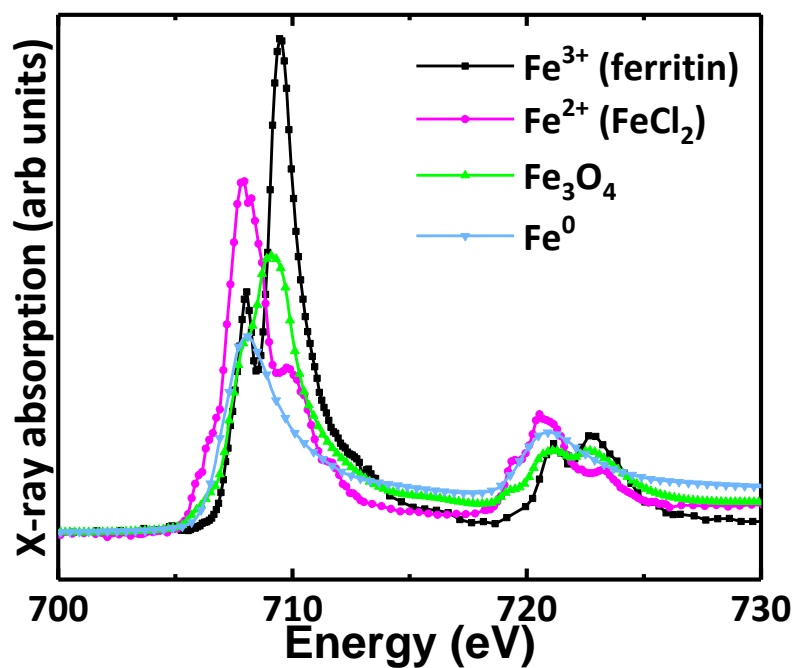

**Figure S2.** Positive correlation between x-ray microscopy peptide maps taken at the carbon  $K$ -absorption edge (left) and oxygen  $K$ -absorption edge (right) absorption edges of a plaque core taken from case Y. Section thickness = 500 nm.

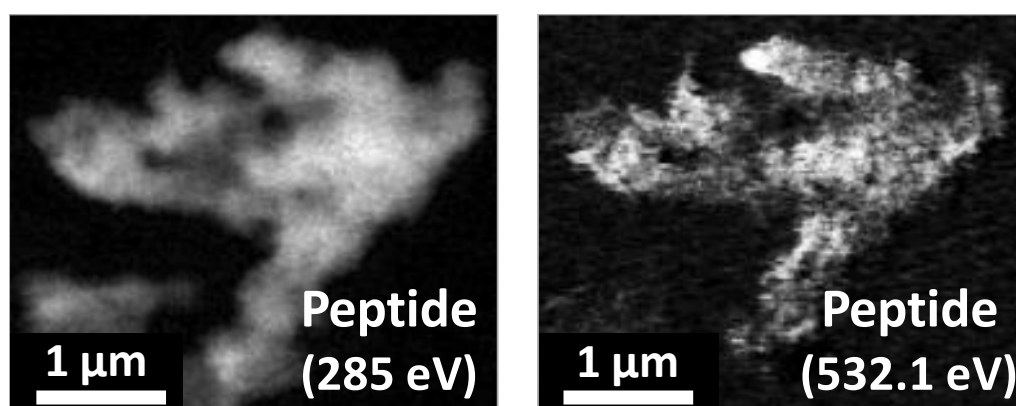

**Figure S3.** X-ray microscopy images taken at 530 eV, displaying the variation in amyloid plaque core size. From AD case Y. Section thickness = 500 nm.

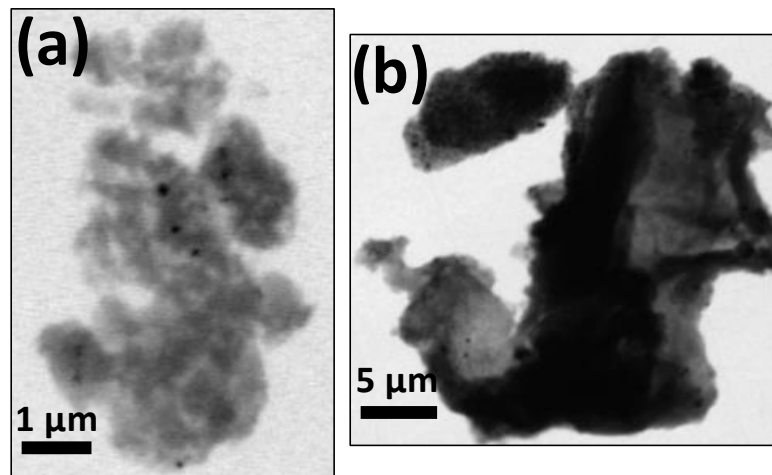

**Figure S4.** Comparisons of x-ray microscopy peptide maps obtained from amyloid plaque cores 200 nm (left) and 500 nm (right) in thickness. 200 nm and 500 nm sections are from cases X and Y respectively.

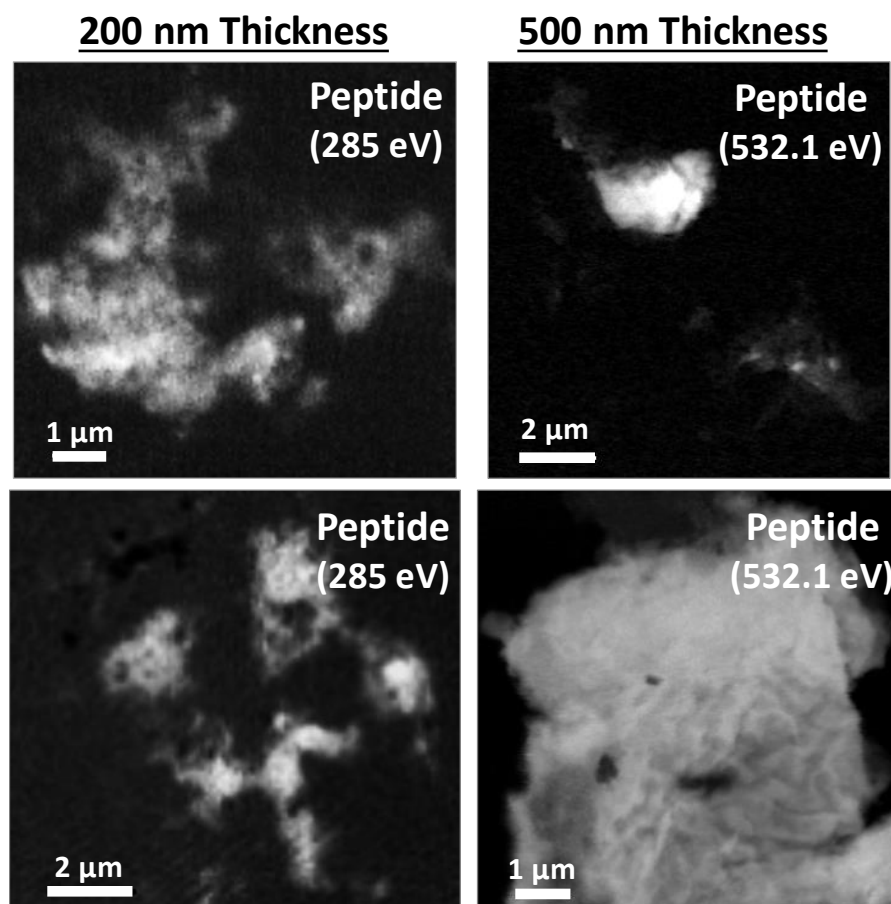

**Figure S5.** X-ray microscopy images and speciation dependent maps of amyloid plaque cores from case Y.

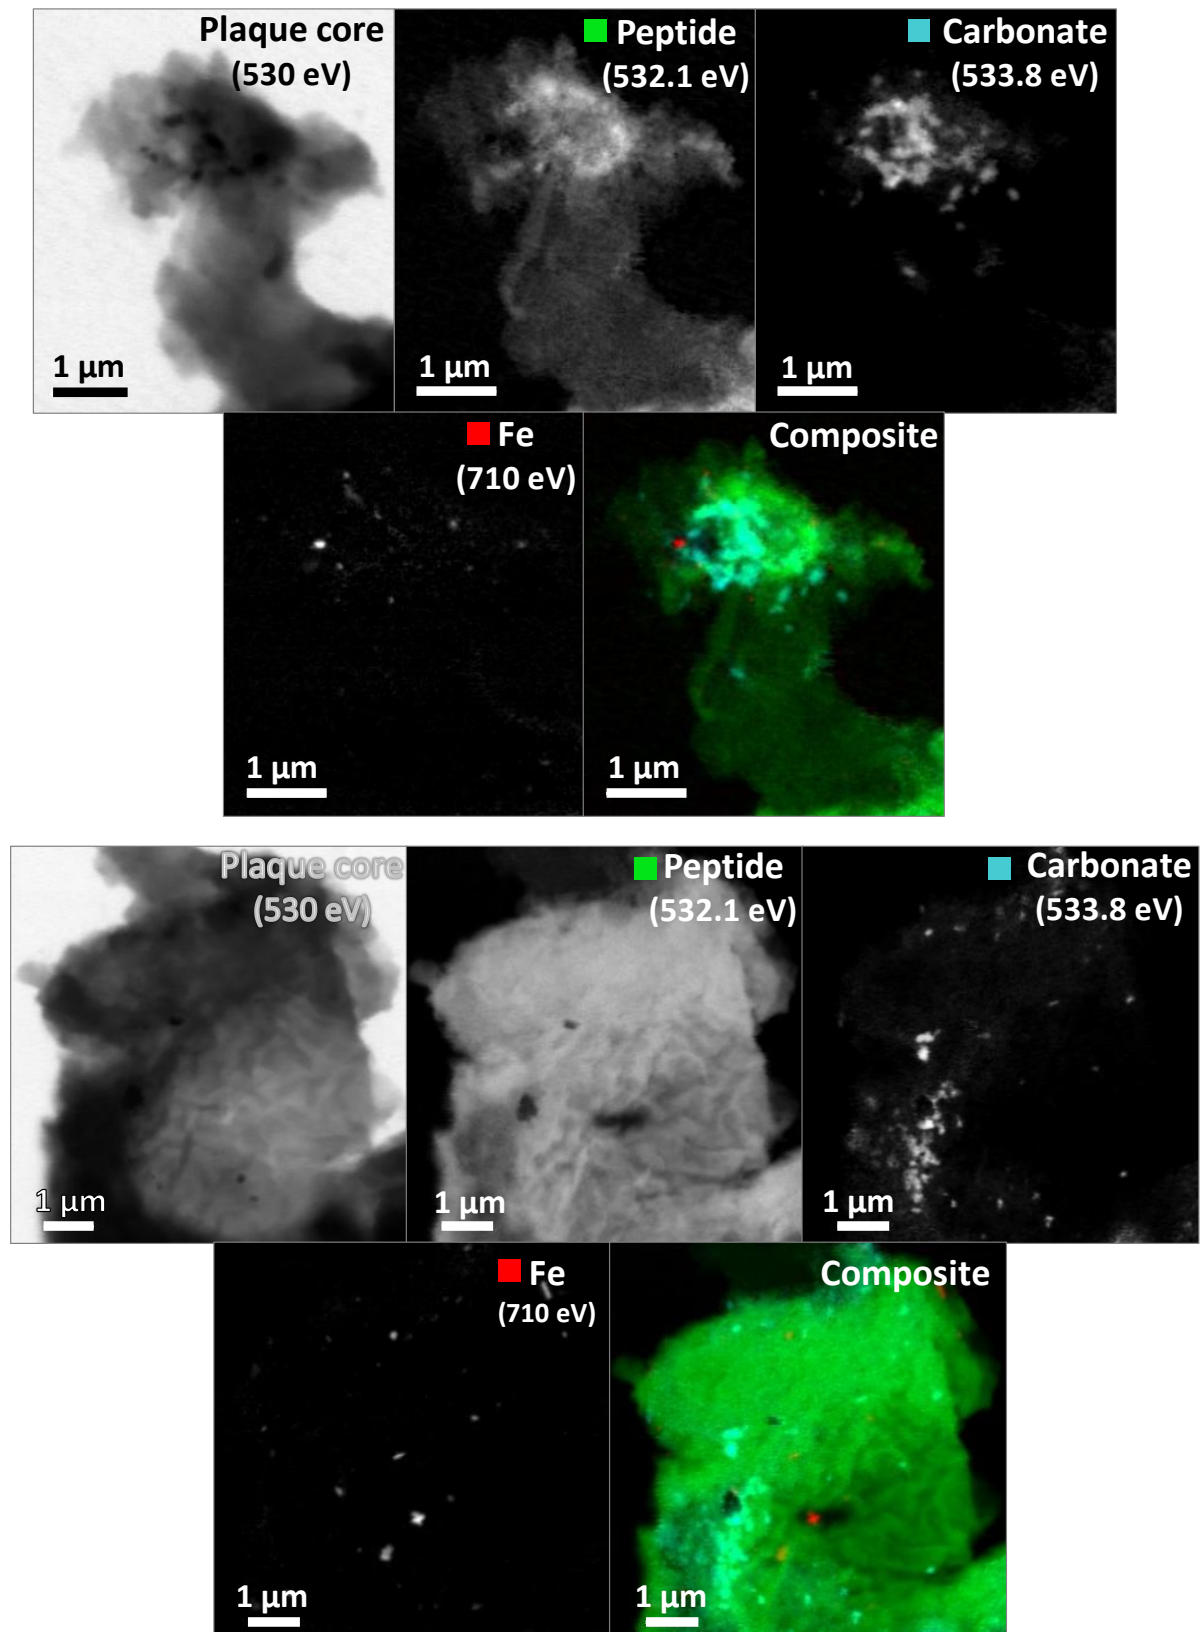

**Figure S6.** Relative intensities of the iron  $L_{2,3}$ -edge absorption reference spectra used to create a fit for spectrum F4 from Figure 5 in the main text.

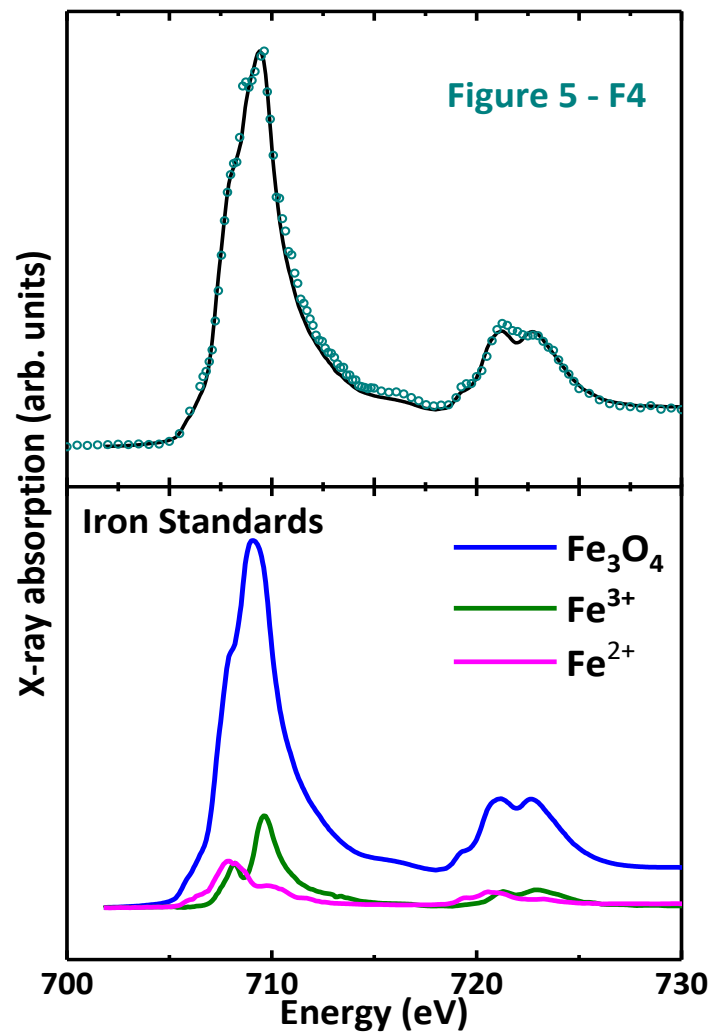

**Figure S7.** Relative intensities of the iron  $L_{2,3}$ -edge absorption reference spectra used to create a fit for spectrum H1 from Figure 5 in the main text.

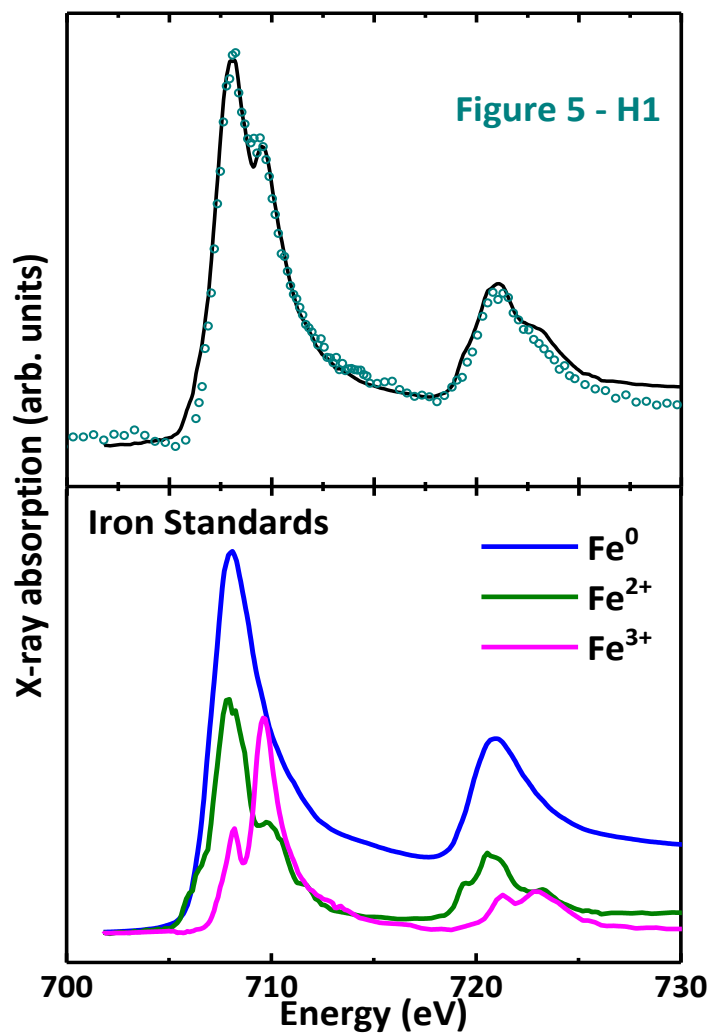

Supplement: NR-010-C7NR06794A-s001.pdf [file NR-010-C7NR06794A-s001.pdf]
